# Supplementary material for: CHCHD4 regulates tumour proliferation and EMT-related phenotypes, through respiratory chain-mediated metabolism
Source: PubMed Central journal article supplement (PMC6632184; doi:10.1186/s40170-019-0200-4), 2019-07-16
Supplement: 40170_2019_200_MOESM1_ESM.pdf [file 40170_2019_200_MOESM1_ESM.pdf]

a

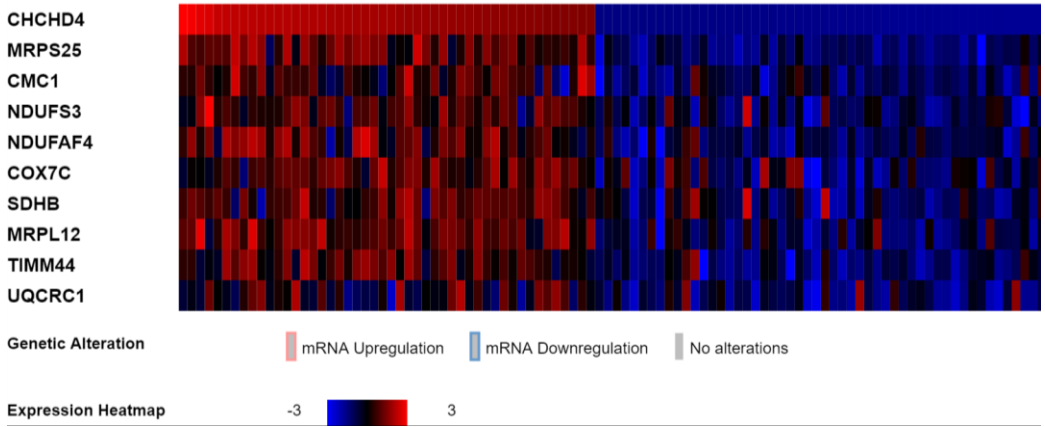

b

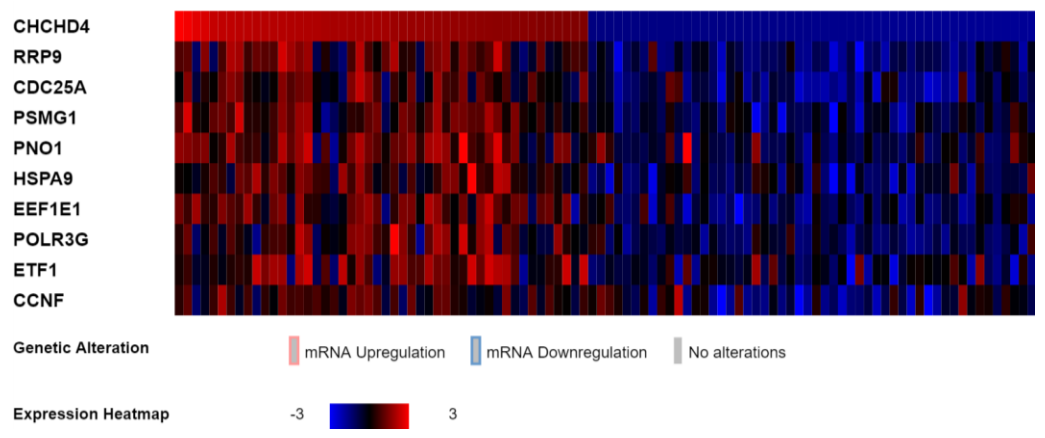

c

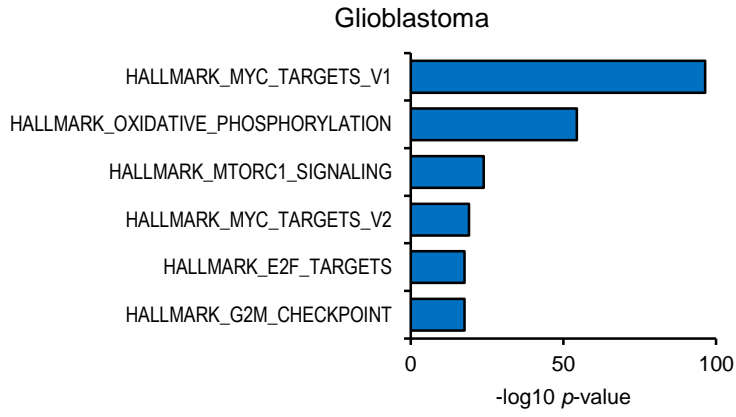

**Figure S1.** *CHCHD4* expression positively correlates with OXPPOS and proliferative pathways in tumours. **a** Heatmap of selected genes from HALLMARK\_OXIDATIVE\_PHOSPHORYLATION gene set (Broad Institute) that are positively correlated with *CHCHD4* expression in Novartis/Broad Institute Cancer Cell Line Encyclopedia RNASeq data.  $n = 967$  cell lines. **b** Heatmap of selected genes from HALLMARK\_MTORC1\_SIGNALLING gene set (Broad Institute) that are positively correlated with *CHCHD4* expression in Novartis/Broad Institute Cancer Cell Line Encyclopedia RNASeq data.  $n = 967$  cell lines. **c** Chart shows GSEA of genes positively correlated with *CHCHD4* expression in glioblastoma patient tumours.
