# Supplementary material for: CHCHD4 regulates tumour proliferation and EMT-related phenotypes, through respiratory chain-mediated metabolism
Source: PubMed Central journal article supplement (PMC6632184; doi:10.1186/s40170-019-0200-4), 2019-07-16
Supplement: 40170_2019_200_MOESM3_ESM.pdf [file 40170_2019_200_MOESM3_ESM.pdf]

**a**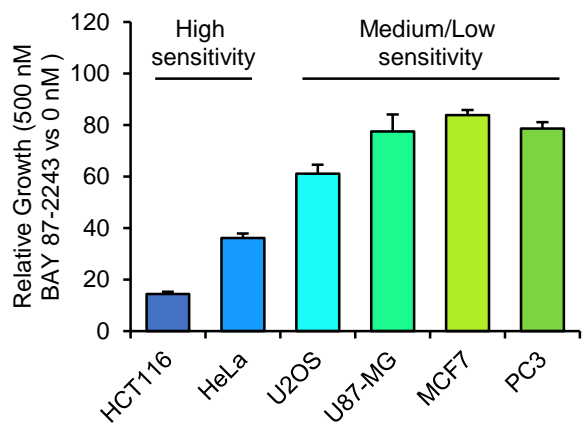**b**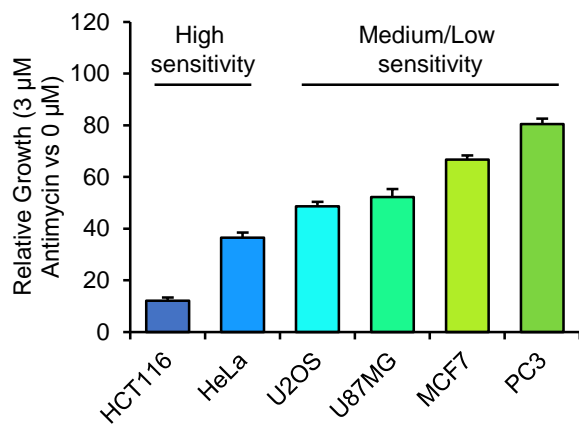**c**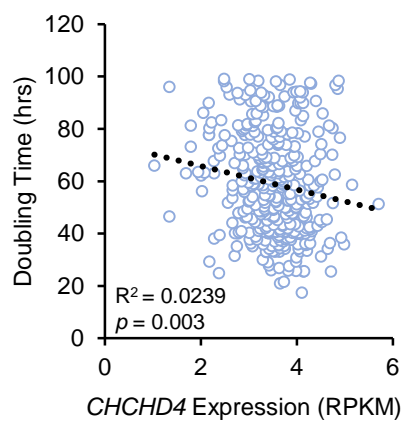

**Figure S3.** CHCHD4 expression links growth rate to CI activity, and correlates with tumour cell doubling time. **a** Chart shows growth of tumour cell line panel treated with 500 nM BAY 87-2243 for 72 h, relative to untreated (0 nM) cells.  $\pm$ SD.  $n = 3$ . **b** Chart shows growth of tumour cell line panel treated with 3  $\mu$ M antimycin A for 72 h, relative to untreated (0 nM) cells.  $\pm$ SD.  $n = 3$ . **c** Chart shows xy scatter of *CHCHD4* transcript levels (RPKM - Reads Per Kilobase of transcript per Million mapped reads), and doubling times for 368 tumour cell lines. Trend line (dashed black),  $R^2$  value (Spearman's correlation) and  $p$ -value of correlation shown.
