# Supplementary material for: CHCHD4 regulates tumour proliferation and EMT-related phenotypes, through respiratory chain-mediated metabolism
Source: PubMed Central journal article supplement (PMC6632184; doi:10.1186/s40170-019-0200-4), 2019-07-16
Supplement: 40170_2019_200_MOESM4_ESM.pdf [file 40170_2019_200_MOESM4_ESM.pdf]

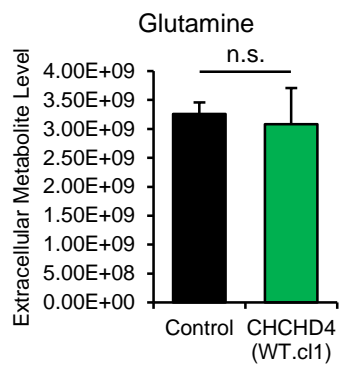

**Figure S4.** CHCHD4-mediated tumour cell growth is linked to CI-regulated mTORC1 signalling and amino acid metabolism. Chart shows extracellular levels of glutamine measured in culture medium from control U2OS cells, and cells expressing wild-type CHCHD4 (WT.c11). Representative of 2 experiments.  $\pm$ SD.  $n = 5$ .
